# Supplementary material
Source: MDPI journal article supplement (https://www.mdpi.com/2410-3888/7/3/96)
Supplement: s1 [file s1]

# Blood Transcriptome Analysis Reveals Gene Expression Differences between Yangtze Finless Porpoises from Two Habitats: Natural and Ex Situ Protected Waters

Wang Liu <sup>1</sup>, Denghua Yin <sup>2</sup>, Danqing Lin <sup>2</sup>, Yan Yan <sup>3</sup>, Xiaoyan Zhu <sup>3</sup>, Congping Ying <sup>1</sup>, Jialu Zhang <sup>2</sup>, Pao Xu <sup>1,2</sup> and Kai Liu <sup>1,2,\*</sup>

- <sup>1</sup> Wuxi Fisheries College, Nanjing Agricultural University, Wuxi 214081, China; liuwang1357@outlook.com (W.L.); yingcp@outlook.com (C.Y.); xup@ffrc.cn (P.X.)
- <sup>2</sup> Key Laboratory of Freshwater Fisheries and Germplasm Resources Utilization, Ministry of Agriculture and Rural Affairs, Freshwater Fisheries Research Center, Chinese Academy of Fishery Sciences, Wuxi 214081, China; denghuayin@outlook.com (D.Y.); lindq@ffrc.cn (D.L.); zhangjialu@ffrc.cn (J.Z.)
- <sup>3</sup> Anqing Aquatic Technology Extension Center Station, Anqing 246001, China; matthew956@163.com (Y.Y.); aqyyjsck@163.com (X.Z.)
- \* Correspondence: liuk@ffrc.cn

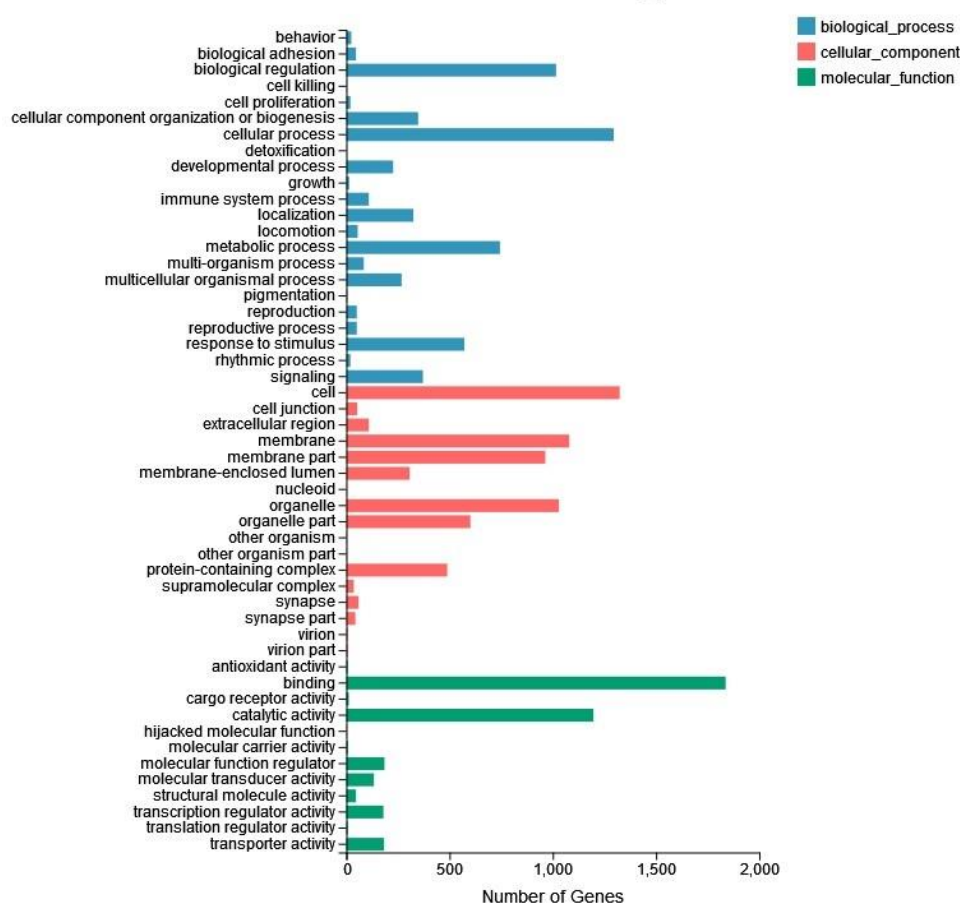

Figure S1. GO classification of differentially expressed genes.

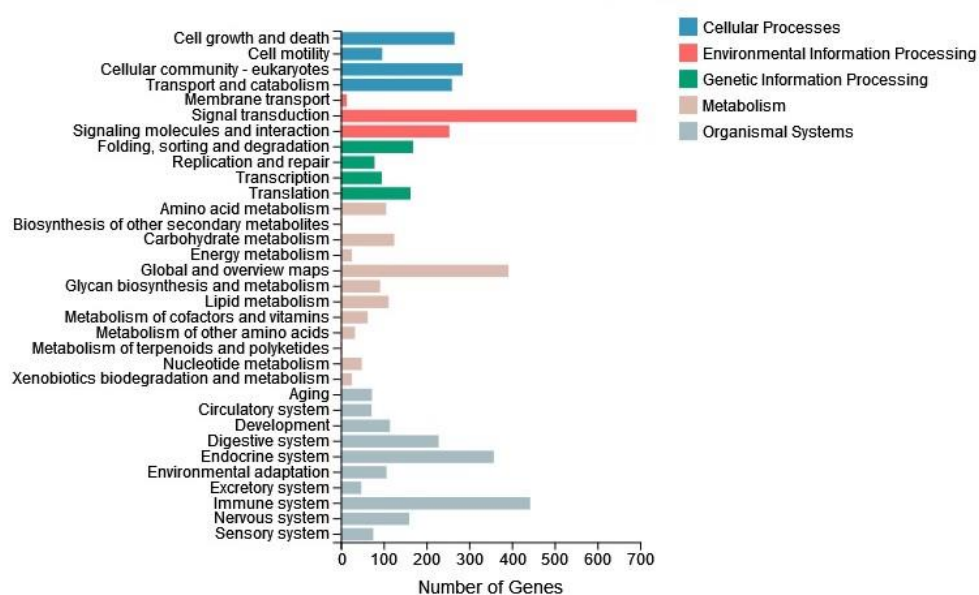

**Figure S2.** KEGG pathway classification of differentially expressed genes.

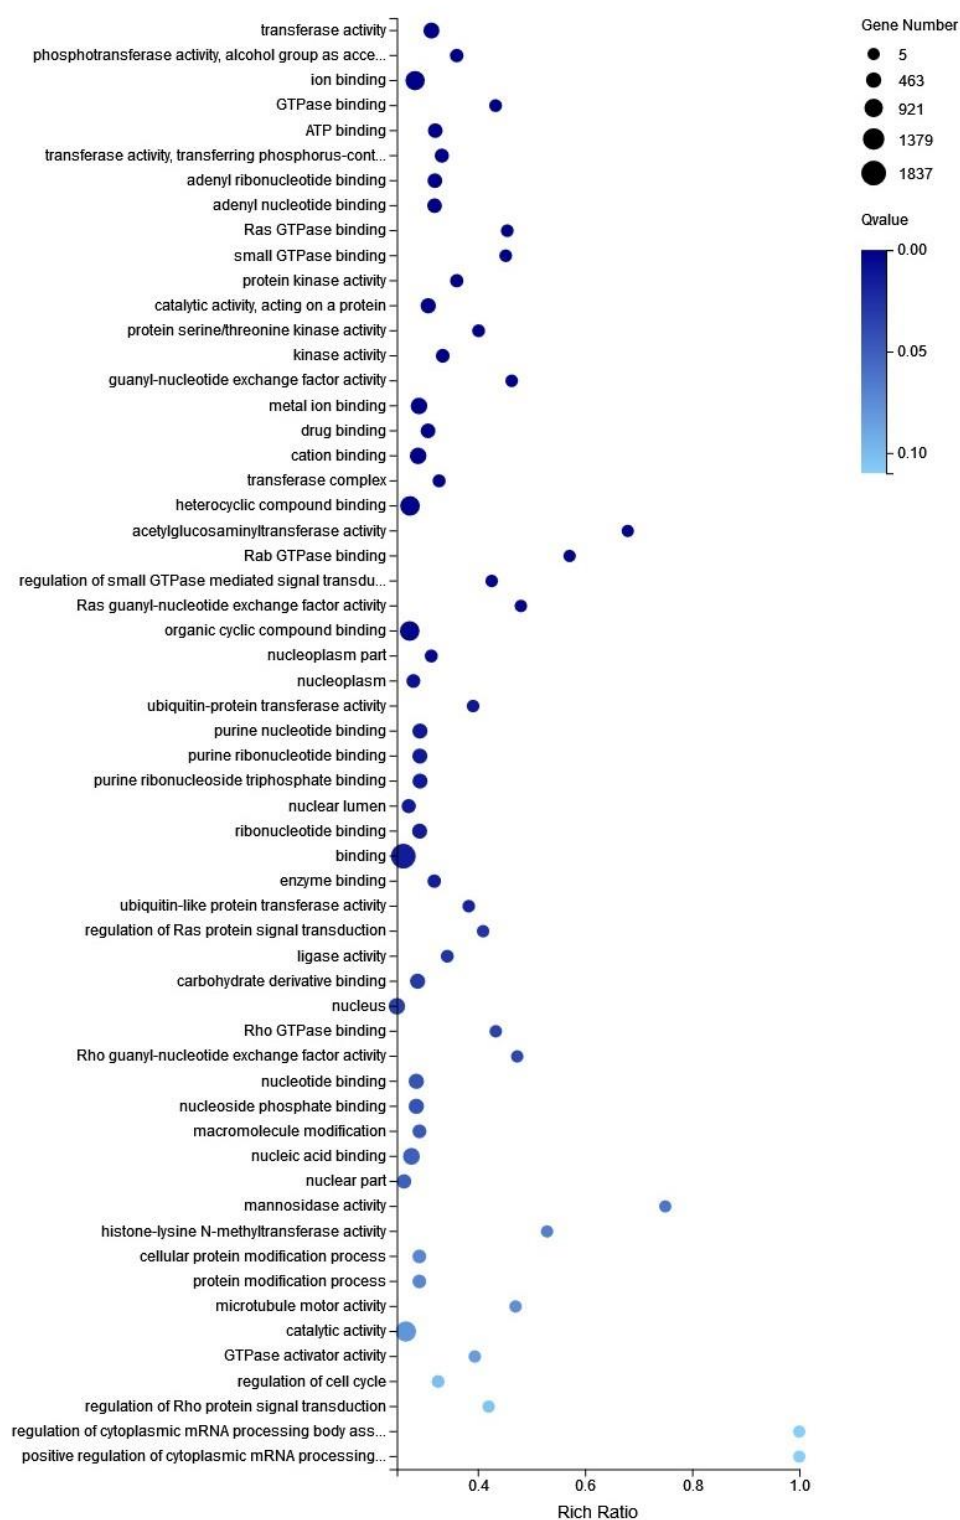

Figure S3. 58 GO terms extremely significantly enriched.

**Table S1.** Morphological information of Yangtze finless porpoises for transcriptomic analysis.

| Code | Group | Sex | Body length(cm) | Body weight(kg) | Estimated age | BMI   |
|------|-------|-----|-----------------|-----------------|---------------|-------|
| CJ_1 | CJ    | M   | 150             | 46.7            | 5.9           | 20.76 |
| CJ_2 | CJ    | M   | 147             | 45              | 5.5           | 20.82 |
| CJ_3 | CJ    | M   | 145.5           | 44.6            | 5.4           | 21.21 |
| XJ_1 | XJ    | M   | 146             | 51.2            | 5.6           | 24.02 |
| XJ_2 | XJ    | M   | 142             | 33.7            | 4.6           | 16.71 |
| XJ_3 | XJ    | M   | 141             | 40              | 4.3           | 20.12 |

**Table S2.** Summary of qRT-PCR primer sequences for Yangtze finless porpoise.

| Gene ID+A2:E8 | Gene name | Full name                                | Forward primer (5'-3')   | Reverse primer (5'-3')    |
|---------------|-----------|------------------------------------------|--------------------------|---------------------------|
| 112414847     | PRDX2     | peroxiredoxin 2                          | TGGCGTGCTGAAGGAAGAT      | GAGAAATATTCCTTGCTGTCGTC   |
| 112403388     | GPX2      | glutathione peroxidase 2                 | GGACTTCACCCAACCTCAACG    | GGTAAAGGTGGGCTGGAATC      |
| 112405252     | FBXO11    | F-box protein 11                         | GATTACCTCAAATAGTGACCCAAC | ACTTCATTCTCTTCTATTACGCCTT |
| 112411265     | PTGS1     | prostaglandin-endoperoxide synthase 1    | AGTACCGTAACCGAATTGCC     | GTCTGTGTTCTACCCCCG        |
| 112407459     | SMAD4     | SMAD family member 4                     | AGGTGGCTGGTCGGAAG        | TGGAGCATTACTCTGCAGTGTTA   |
| 112391848     | GAPDH     | glyceraldehyde-3-phosphate dehydrogenase | AGGTCGGAGTGAACGGATTT     | TTCTCAGCCTTGACTGTGCC      |
